# Supplementary material for: Association between thyroid hormones and insulin resistance indices based on the Korean National Health and Nutrition Examination Survey
Source: PubMed Central journal article supplement (PMC8571382; doi:10.1038/s41598-021-01101-z), 2021-11-05
Supplement: 41598_2021_1101_MOESM1_ESM.pdf [file 41598_2021_1101_MOESM1_ESM.pdf]

Supplementary Table S1. Subgroup analysis of the association between thyroid function and TyG index according to menopausal status

| Model <sup>#</sup> | variable    | Pre-menopausal (n=2200) |        |         | Post-menopausal (n=645) |        |         |        |        |
|--------------------|-------------|-------------------------|--------|---------|-------------------------|--------|---------|--------|--------|
|                    |             | Beta                    | 95% CI | P value | Beta                    | 95% CI | P value |        |        |
| 1                  | LnTSH       | 0.046                   | 0.027  | 0.065   | <.0001*                 | 0.013  | -0.013  | 0.040  | 0.328  |
| 2                  | LnTSH       | 0.044                   | 0.029  | 0.058   | <.0001*                 | 0.011  | -0.016  | 0.037  | 0.426  |
| 3                  | LnTSH       | 0.042                   | 0.028  | 0.057   | <.0001*                 | 0.013  | -0.012  | 0.038  | 0.319  |
| 1                  | Ln(free T4) | -0.263                  | -0.366 | -0.160  | <.0001*                 | -0.128 | -0.247  | -0.009 | 0.035* |
| 2                  | Ln(free T4) | -0.145                  | -0.236 | -0.055  | 0.002*                  | -0.122 | -0.240  | -0.003 | 0.044* |
| 3                  | Ln(free T4) | -0.129                  | -0.218 | -0.040  | 0.005*                  | -0.133 | -0.247  | -0.020 | 0.022* |

#Model 1: linear regression analysis, 2: multiple regression analysis after adjustment for age, sex, systolic blood pressure, BMI, alcohol consumption, 3: multiple regression analysis after adjustment for age, sex, systolic blood pressure, waist circumference, alcohol consumption. \*P-values <0.05 were considered as statistically significant

Supplementary Table S2. Subgroup analysis of the association between categorical thyroid function and TyG index according to menopausal status

| Model <sup>#</sup> | variable                    | Pre-menopausal (n=2200) |        |        | Post-menopausal (n=645) |         |        |       |         |         |       |
|--------------------|-----------------------------|-------------------------|--------|--------|-------------------------|---------|--------|-------|---------|---------|-------|
|                    |                             | Beta                    | 95% CI |        | P value                 | Beta    | 95% CI |       | P value |         |       |
| 1                  |                             |                         |        |        |                         |         |        |       | <.0001* | 0.550   |       |
|                    | Overt hypothyroidism        | 0.342                   | 0.192  | 0.492  | <.0001                  | 0.046   | -0.137 | 0.229 | 0.621   |         |       |
|                    | Subclinical hypothyroidism  | 0.091                   | 0.014  | 0.169  | 0.021                   | 0.054   | -0.050 | 0.158 | 0.306   |         |       |
|                    | Euthyroid                   | 0 (ref)                 |        |        |                         | 0 (ref) |        |       |         |         |       |
|                    | Subclinical hyperthyroidism | -0.084                  | -0.156 | -0.012 | 0.023                   | 0.027   | -0.125 | 0.179 | 0.729   |         |       |
|                    | Overt hyperthyroidism       | -0.062                  | -0.184 | 0.061  | 0.323                   | -0.110  | -0.288 | 0.067 | 0.222   |         |       |
| 2                  |                             |                         |        |        |                         |         |        |       |         | <.0001* | 0.383 |
|                    | Overt hypothyroidism        | 0.215                   | 0.122  | 0.309  | <.0001                  | 0.048   | -0.087 | 0.184 | 0.484   |         |       |
|                    | Subclinical hypothyroidism  | 0.058                   | -0.011 | 0.127  | 0.100                   | 0.071   | -0.032 | 0.173 | 0.178   |         |       |
|                    | Euthyroid                   | 0 (ref)                 |        |        |                         | 0 (ref) |        |       |         |         |       |
|                    | Subclinical hyperthyroidism | -0.074                  | -0.148 | 0.001  | 0.052                   | 0.058   | -0.085 | 0.200 | 0.427   |         |       |
|                    | Overt hyperthyroidism       | -0.071                  | -0.144 | 0.003  | 0.058                   | -0.101  | -0.284 | 0.083 | 0.282   |         |       |
| 3                  |                             |                         |        |        |                         |         |        |       |         | <.0001* | 0.268 |
|                    | Overt hypothyroidism        | 0.204                   | 0.107  | 0.300  | <.0001                  | 0.053   | -0.071 | 0.177 | 0.406   |         |       |
|                    | Subclinical hypothyroidism  | 0.061                   | -0.008 | 0.131  | 0.084                   | 0.072   | -0.022 | 0.166 | 0.134   |         |       |
|                    | Euthyroid                   | 0 (ref)                 |        |        |                         | 0 (ref) |        |       |         |         |       |
|                    | Subclinical hyperthyroidism | -0.069                  | -0.138 | -0.001 | 0.048                   | 0.059   | -0.078 | 0.196 | 0.399   |         |       |
|                    | Overt hyperthyroidism       | -0.056                  | -0.121 | 0.009  | 0.089                   | -0.099  | -0.261 | 0.064 | 0.233   |         |       |

#Model 1: linear regression analysis, 2: multiple regression analysis after adjustment for age, sex, systolic blood pressure, BMI, alcohol consumption, 3: multiple regression analysis after adjustment for age, sex, systolic blood pressure, waist circumference, alcohol consumption. \*P-values <0.05 were considered as statistically significant

Supplementary Table S3. Subgroup analysis of the association between thyroid function and HOMA-IR index according to menopausal status

| Model# | variable    | Pre-menopausal (n=728) |              |         | Post-menopausal (n=204) |              |         |
|--------|-------------|------------------------|--------------|---------|-------------------------|--------------|---------|
|        |             | Beta                   | 95% CI       | P value | Beta                    | 95% CI       | P value |
| 1      | LnTSH       | 0.058                  | -0.001 0.117 | 0.052   | -0.071                  | -0.194 0.051 | 0.253   |
| 2      | LnTSH       | 0.052                  | 0.001 0.103  | 0.046*  | -0.068                  | -0.170 0.035 | 0.196   |
| 3      | LnTSH       | 0.046                  | -0.003 0.095 | 0.067   | -0.066                  | -0.167 0.035 | 0.201   |
| 1      | Ln(free T4) | -0.226                 | -0.547 0.094 | 0.167   | 0.635                   | 0.118 1.152  | 0.016*  |
| 2      | Ln(free T4) | -0.328                 | -0.671 0.014 | 0.060   | 0.448                   | -0.083 0.980 | 0.098   |
| 3      | Ln(free T4) | -0.269                 | -0.591 0.052 | 0.100   | 0.389                   | -0.180 0.958 | 0.180   |

#Model 1: linear regression analysis, 2: multiple regression analysis after adjustment for age, sex, systolic blood pressure, BMI, alcohol consumption, 3: multiple regression analysis after adjustment for age, sex, systolic blood pressure, waist circumference, alcohol consumption. \*P-values <0.05 were considered as statistically significant

Supplementary Table S4. Subgroup analysis of the association between categorical thyroid function and HOMA-IR index according to menopausal status

| Model <sup>#</sup> | variable                    | Pre-menopausal (n=728) |        |        | Post-menopausal (n=204) |         |        |       |         |
|--------------------|-----------------------------|------------------------|--------|--------|-------------------------|---------|--------|-------|---------|
|                    |                             | Beta                   | 95% CI |        | P value                 | Beta    | 95% CI |       | P value |
| 1                  |                             |                        |        |        |                         |         |        |       |         |
|                    | Overt hypothyroidism        | 0.418                  | 0.251  | 0.585  | <.0001*                 | -0.116  | -0.790 | 0.559 | 0.737   |
|                    | Subclinical hypothyroidism  | 0.267                  | -0.062 | 0.595  | 0.111                   | -0.108  | -0.581 | 0.365 | 0.655   |
|                    | Euthyroid                   | 0 (ref)                |        |        |                         | 0 (ref) |        |       |         |
|                    | Subclinical hyperthyroidism | -0.187                 | -0.623 | 0.248  | 0.399                   | -0.033  | -0.446 | 0.380 | 0.876   |
|                    | Overt hyperthyroidism       | -0.093                 | -0.363 | 0.176  | 0.497                   | 1.812   | 1.717  | 1.907 | <.0001  |
| 2                  |                             |                        |        |        | 0.042*                  |         |        |       | <.0001* |
|                    | Overt hypothyroidism        | 0.374                  | -0.016 | 0.763  | 0.060                   | 0.106   | -0.275 | 0.486 | 0.585   |
|                    | Subclinical hypothyroidism  | 0.137                  | -0.060 | 0.334  | 0.171                   | -0.241  | -0.610 | 0.128 | 0.200   |
|                    | Euthyroid                   | 0 (ref)                |        |        |                         | 0 (ref) |        |       |         |
|                    | Subclinical hyperthyroidism | -0.279                 | -0.535 | -0.024 | 0.032                   | 0.180   | -0.169 | 0.530 | 0.312   |
|                    | Overt hyperthyroidism       | -0.016                 | -0.400 | 0.369  | 0.936                   | 1.812   | 1.677  | 1.946 | <.0001  |
| 3                  |                             |                        |        |        | 0.034*                  |         |        |       | <.0001* |
|                    | Overt hypothyroidism        | 0.336                  | 0.058  | 0.614  | 0.018                   | 0.069   | -0.319 | 0.457 | 0.728   |
|                    | Subclinical hypothyroidism  | 0.158                  | -0.062 | 0.377  | 0.158                   | -0.163  | -0.533 | 0.207 | 0.386   |
|                    | Euthyroid                   | 0 (ref)                |        |        |                         | 0 (ref) |        |       |         |
|                    | Subclinical hyperthyroidism | -0.255                 | -0.535 | 0.025  | 0.075                   | 0.207   | -0.014 | 0.427 | 0.066   |
|                    | Overt hyperthyroidism       | 0.053                  | -0.296 | 0.402  | 0.765                   | 1.827   | 1.690  | 1.965 | <.0001  |

#Model 1: linear regression analysis, 2: multiple regression analysis after adjustment for age, sex, systolic blood pressure, BMI, alcohol consumption, 3: multiple regression analysis after adjustment for age, sex, systolic blood pressure, waist circumference, alcohol consumption \*P-values <0.05 were considered as statistically significant

Supplementary Table S5. Subgroup analysis of the association between categorical thyroid function and TyG index/HOMA-IR index in euthyroid population

| Outcome   | Model <sup>#</sup> | variable | Total (n=5315) |        |         | Male (n=2701) |        |         | Female (n=2614) |        |         |        |       |         |
|-----------|--------------------|----------|----------------|--------|---------|---------------|--------|---------|-----------------|--------|---------|--------|-------|---------|
|           |                    |          | Beta           | 95% CI | P value | Beta          | 95% CI | P value | Beta            | 95% CI | P value |        |       |         |
| TyG index | 1                  | LnTSH    | 0.018          | -0.001 | 0.037   | 0.058         | 0.006  | -0.019  | 0.032           | 0.629  | 0.052   | 0.028  | 0.077 | <.0001* |
|           | 2                  | LnTSH    | 0.030          | 0.014  | 0.046   | <.0001*       | 0.020  | -0.002  | 0.042           | 0.077  | 0.045   | 0.023  | 0.067 | <.0001* |
| HOMA-IR   | Model <sup>#</sup> | variable | Total (n=1741) |        |         | Male (n=886)  |        |         | Female (n=855)  |        |         |        |       |         |
|           |                    |          | Beta           | 95% CI | P value | Beta          | 95% CI | P value | Beta            | 95% CI | P value |        |       |         |
| HOMA-IR   | 1                  | LnTSH    | 0.018          | -0.053 | 0.089   | 0.611         | 0.051  | -0.070  | 0.173           | 0.406  | -0.009  | -0.090 | 0.072 | 0.822   |
|           | 2                  | LnTSH    | -0.002         | -0.063 | 0.059   | 0.955         | -0.015 | -0.116  | 0.087           | 0.775  | 0.010   | -0.056 | 0.077 | 0.762   |

#Model 1: linear regression analysis, 2: multiple regression analysis after adjustment for age, sex, systolic blood pressure, BMI, alcohol consumption. \*P-values <0.05 were considered as statistically significant
